# Supplementary material for: A proxy for atmospheric daytime gaseous sulfuric acid concentration in urban Beijing
Source: Copernicus journal article supplement (doi:10.5194/acp-19-1971-2019), 2019-02-13
Supplement: Supplementary file 1 [file acp-19-1971-2019-supplement.pdf]

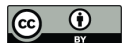

## *Supplement of*

# **A proxy for atmospheric daytime gaseous sulfuric acid concentration in urban Beijing**

**Yiqun Lu et al.**

*Correspondence to:* Lin Wang ([lin\\_wang@fudan.edu.cn](mailto:lin_wang@fudan.edu.cn))

The copyright of individual parts of the supplement might differ from the CC BY 4.0 License.

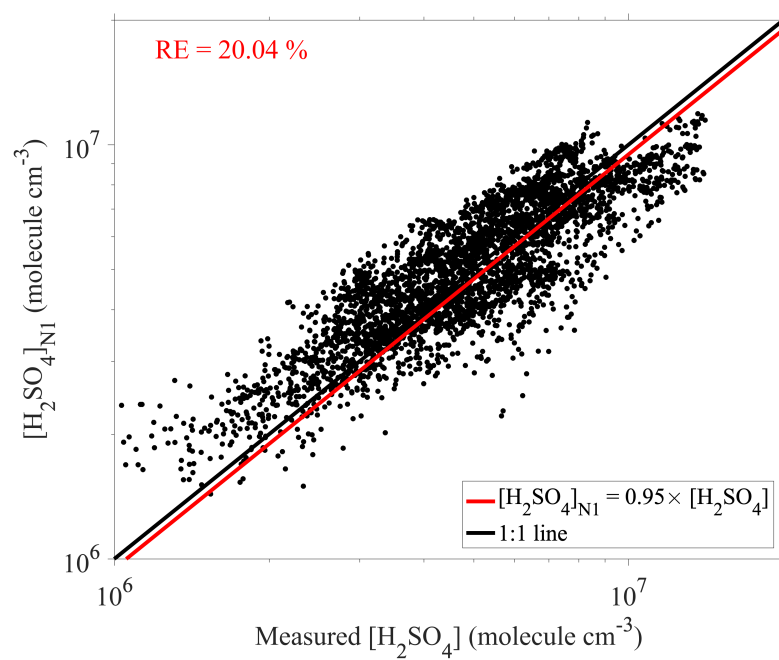

**Figure S1a**

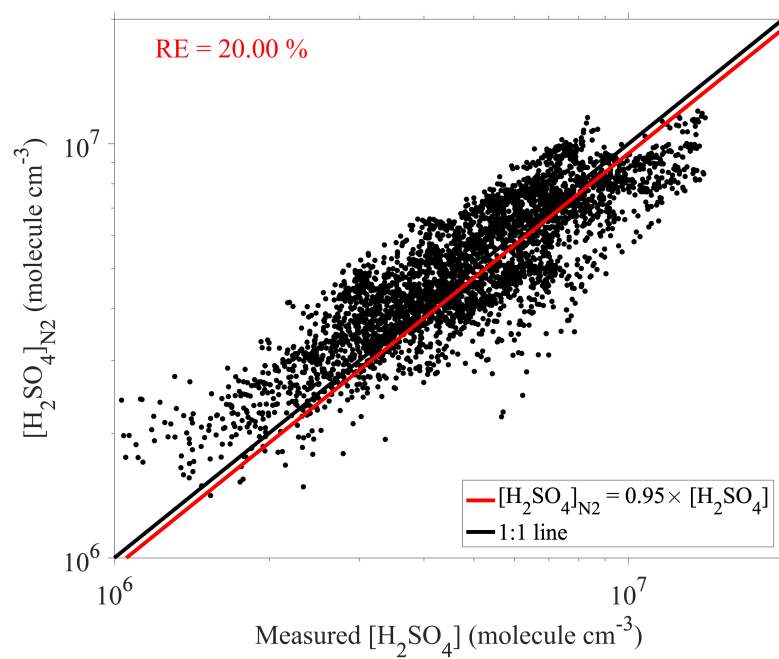

**Figure S1b**

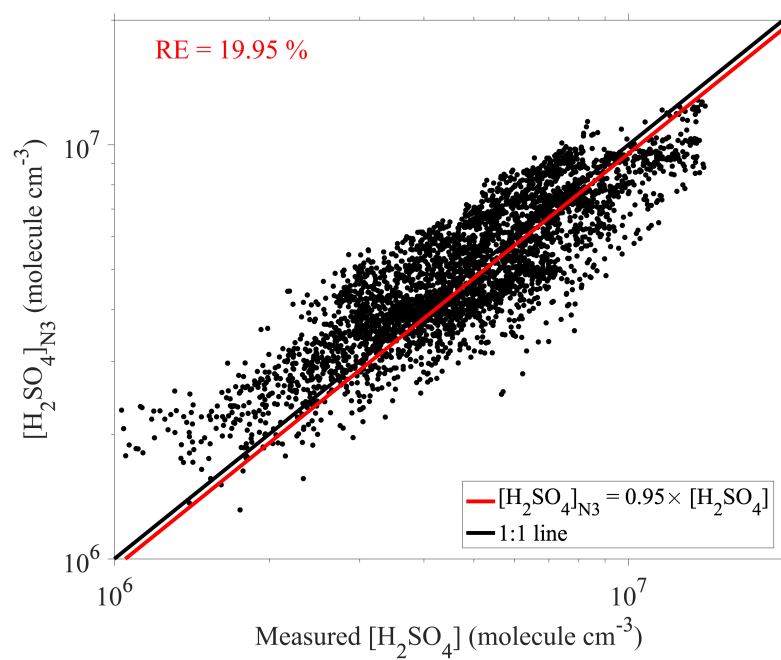

**Figure S1c**

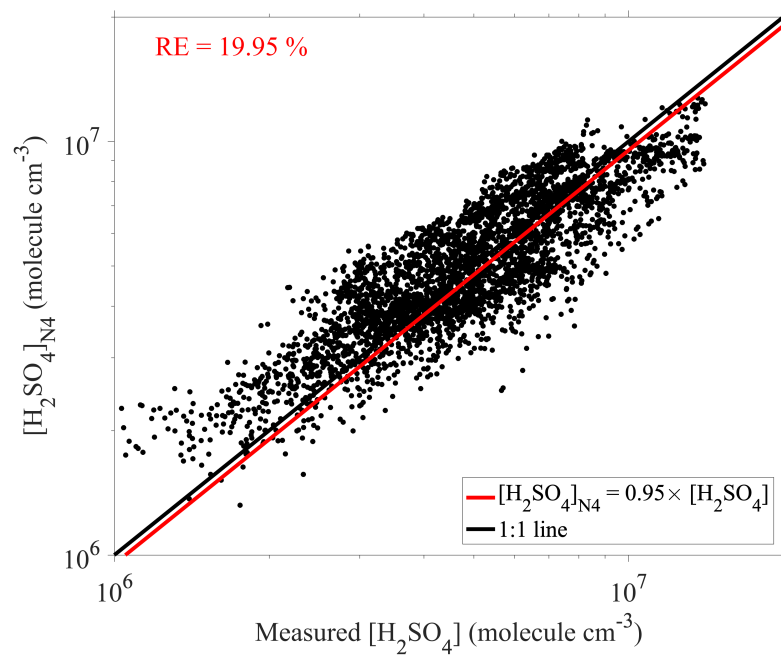

**Figure S1d**

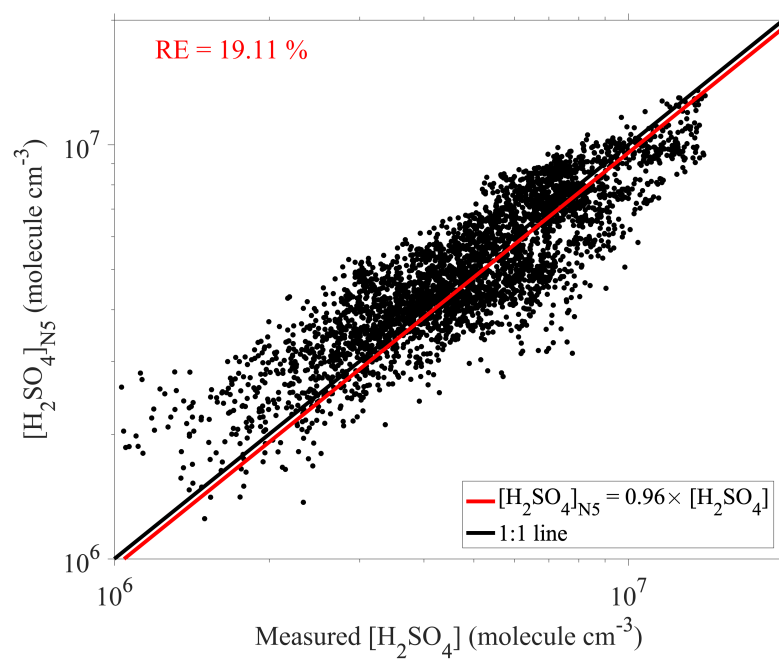

**Figure S1e**

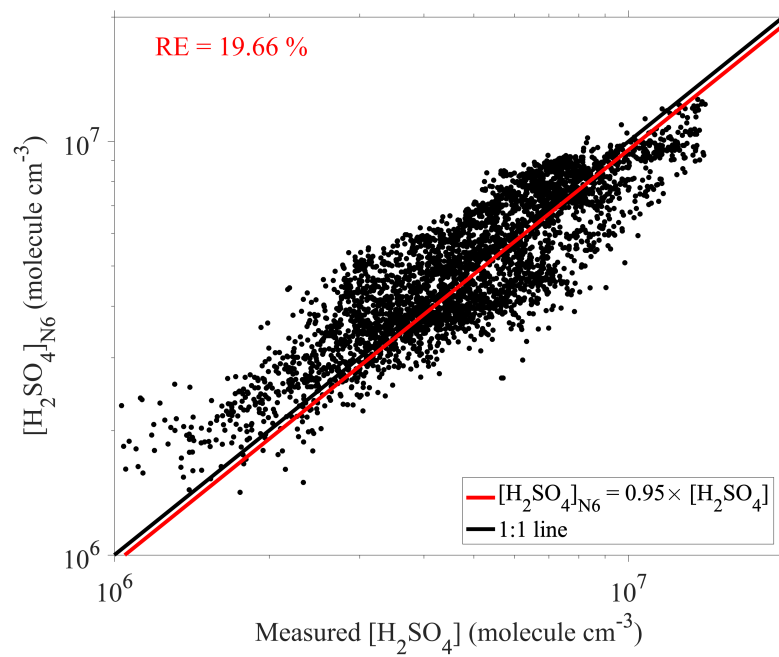

**Figure S1f**

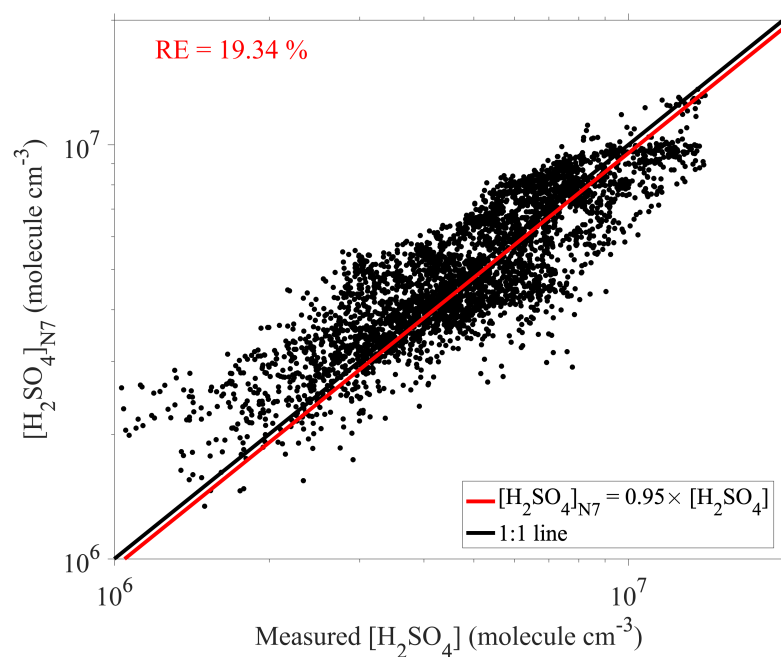

**Figure S1g**

**Figure S1.** (a-g) Correlations between measured  $[\text{H}_2\text{SO}_4]$  and predicted values given by proxies N1-N7, respectively. The black line represents a 1:1 plot. The red line represents a linear fit between  $[\text{H}_2\text{SO}_4]_{\text{Ni}}$  and measured  $[\text{H}_2\text{SO}_4]$  with a zero intercept.
